# Supplementary material
Source: publisher figshare collection journal article supplement (https://diabetesjournals.figshare.com/articles/dataset/_/17189177)
Supplement: Supplementary file 2 [file 1]

## **Supplementary Files**

**Obesity-induced *miR-455* upregulation promotes adaptive pancreatic  $\beta$ -cell proliferation through the CPEB1/CDKN1B pathway**

### **File list**

#### **Supplementary Figures:**

Supplementary Figure 1

Supplementary Figure 2

Supplementary Figure 3

Supplementary Figure 4

Supplementary Figure 5

Supplementary Figure 6

Supplementary Figure 7

#### **Supplementary Spreadsheets:**

Table S1

Table S2

Table S3

Table S4

Table S5

Supplementary Figure 1

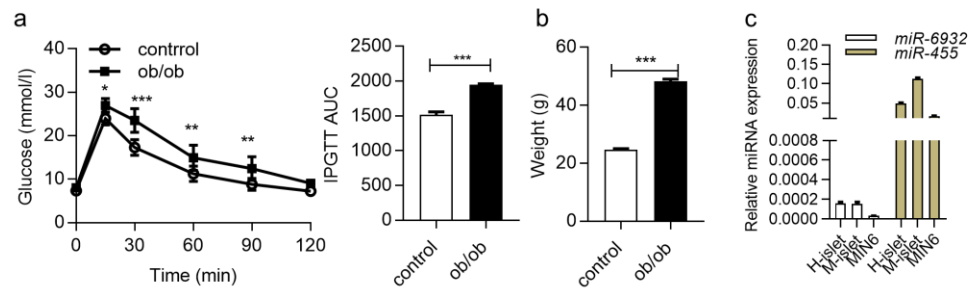

**Supplementary Figure 1** (a) Blood glucose measurements during a glucose tolerance test in 8-week *ob/ob* mice and control mice ( $n = 6$  mice per group). (b) The weight of 8-week-old *ob/ob* mice ( $n = 6$  mice per group). (c) The expression levels of *miR-455* and *miR-6932* in human islets, mouse islets and MIN6 cells. The data are presented as the mean  $\pm$  SD. \*  $p < 0.05$ , \*\*  $p < 0.01$ , \*\*\*  $p < 0.001$ .

Supplementary Figure 2

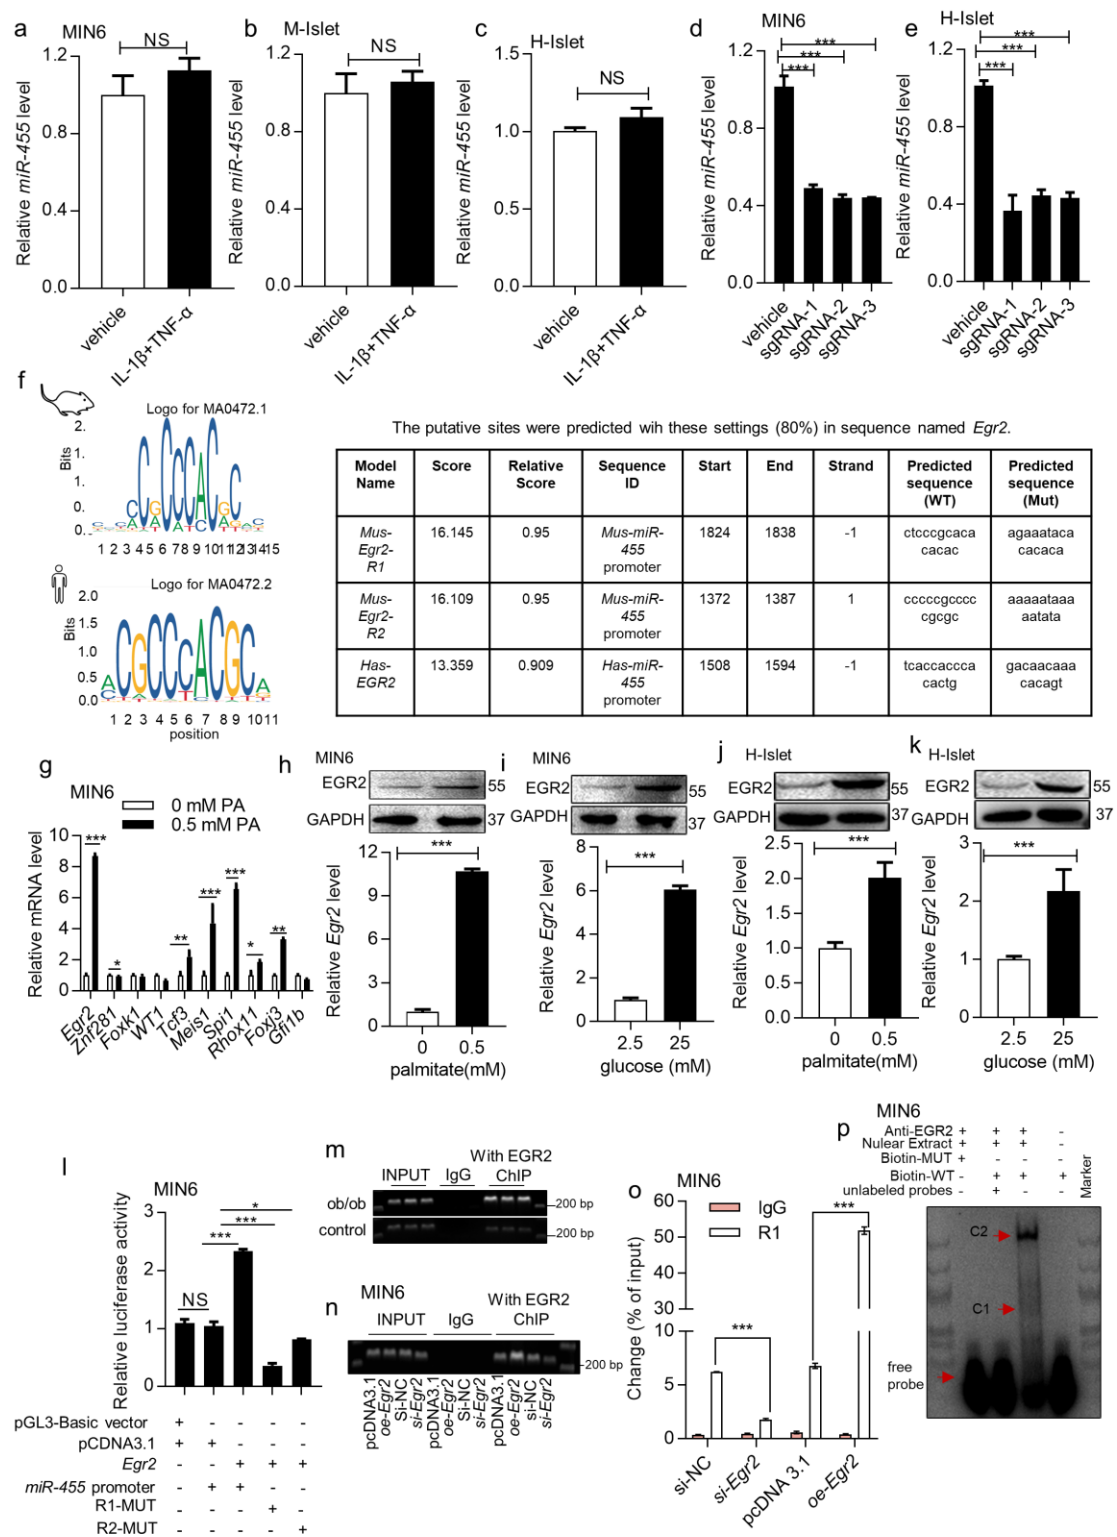

**Supplementary Figure 2** MIN6 cells (a), mouse primary islets (b,  $n = 3$ ), and human islets (c) were incubated with a combination of interleukin-1 $\beta$  (IL-1 $\beta$ , 5 ng/ml) and tumor necrosis factor- $\alpha$  (TNF- $\alpha$ , 30 ng/ml) for 48 h, and qRT-PCR was performed to examine the *miR-455* expression level. (d-e) The expression level of *miR-455* in MIN6 cells (d) and in human islets (e) transfected

with *miR-455* sgRNA. (f) The binding sites of *Egr2* in the *mus-miR-455* and *human-miR-455* promoters predicted by JASPAR. (g) MIN6 cells were incubated with 0.5 mM palmitate for 48 h, and qRT-PCR was performed to examine the expression levels of transcription factors predicted by JASPAR. MIN6 cells and human islets were incubated with 0.5 mM palmitate or 25 mM glucose for 48 h, and the protein and mRNA levels of EGR2 were determined by western blotting and qRT-PCR (h-k), respectively. (l) Relative luciferase activity in MIN6 cells cotransfected with *Egr2* overexpression plasmid and a luciferase reporter containing either *miR-455 promoter* or *miR-455-MUT* (*Egr2*-binding sequence mutated). The data are presented as the relative ratio of Renilla luciferase activity to firefly luciferase activity. ChIP experiments were conducted to verify that *Egr2* binds to the promoter of *miR-455* in islets from obese mice (m). ChIP experiments were conducted to verify that *Egr2* binds to the promoter of *miR-455* in MIN6 cells transfected with *oe-Egr2* or *si-Egr2*, followed by RT-PCR (n) and qRT-PCR (o) assays. (p) Based on EMSA results, *Egr2* can directly bind to the *miR-455* promoter in MIN6 cells. C1 and C2 represent nuclear protein-*miR-455* probe complexes and nuclear protein-*miR-455* probe-anti-EGR2 complexes, respectively. The data are presented as the mean  $\pm$  SD. \*  $p < 0.05$ , \*\*  $p < 0.01$ , \*\*\*  $p < 0.001$ .

Supplementary Figure 3

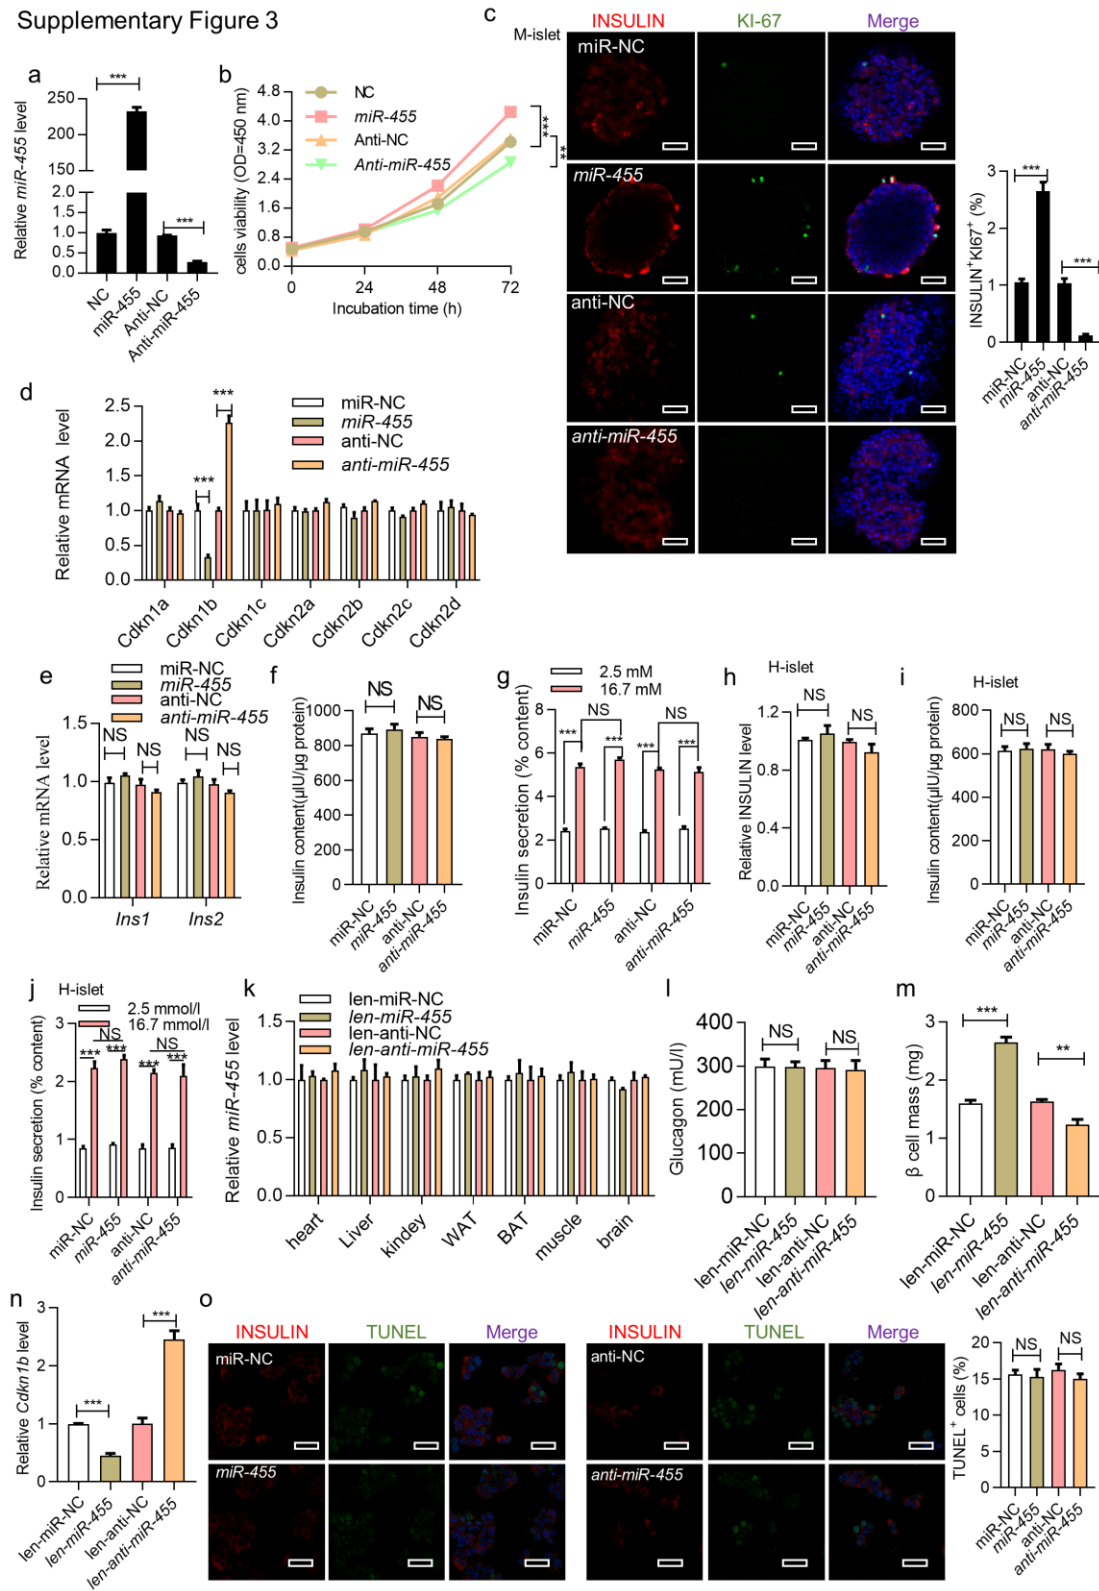

**Supplementary Figure 3** MIN6 cells were transfected with *miR-455* or *anti-miR-455* for 48 h, and qRT-PCR was performed to detect the *miR-455* expression level (a). (b) CCK-8 assays were carried out at 24, 48, and 72 h after transfection. (c) INSULIN<sup>+</sup>/KI-67<sup>+</sup> cells were counted via immunofluorescence. Magnification: 20 x; scale bar, 20 μm. (d) The mRNA expression levels of

*Cdkn1* and *Cdkn2* family genes. The *Ins1* and *Ins2* expression levels (e), insulin content (f) and insulin secretion (g) in MIN6 cells. INSULIN levels (h), insulin content (i) and insulin secretion (j) in human islets. (k) The *miR-455* expression levels in different tissues from *len-miR-455* or *len-anti-miR-455* mice ( $n = 3$ ). (l) The glucagon level in serum from *len-miR-455* or *len-anti-miR-455* mice ( $n = 9$  mice per group). (m) The  $\beta$  cell mass in *len-miR-455* or *len-anti-miR-455* mice ( $n = 3$ ). (n) The mRNA levels of *Cdkn1b* in the islets of *len-miR-455* or *len-anti-miR-455* mice ( $n = 3$ ). (o) INSULIN<sup>+</sup>/TUNEL<sup>+</sup> cells were counted via immunofluorescence. Magnification: 20 x; scale bar, 20  $\mu$ m. The data are presented as the mean  $\pm$  SD. \*\*  $p < 0.01$ , \*\*\*  $p < 0.001$ .

Supplementary Figure 4

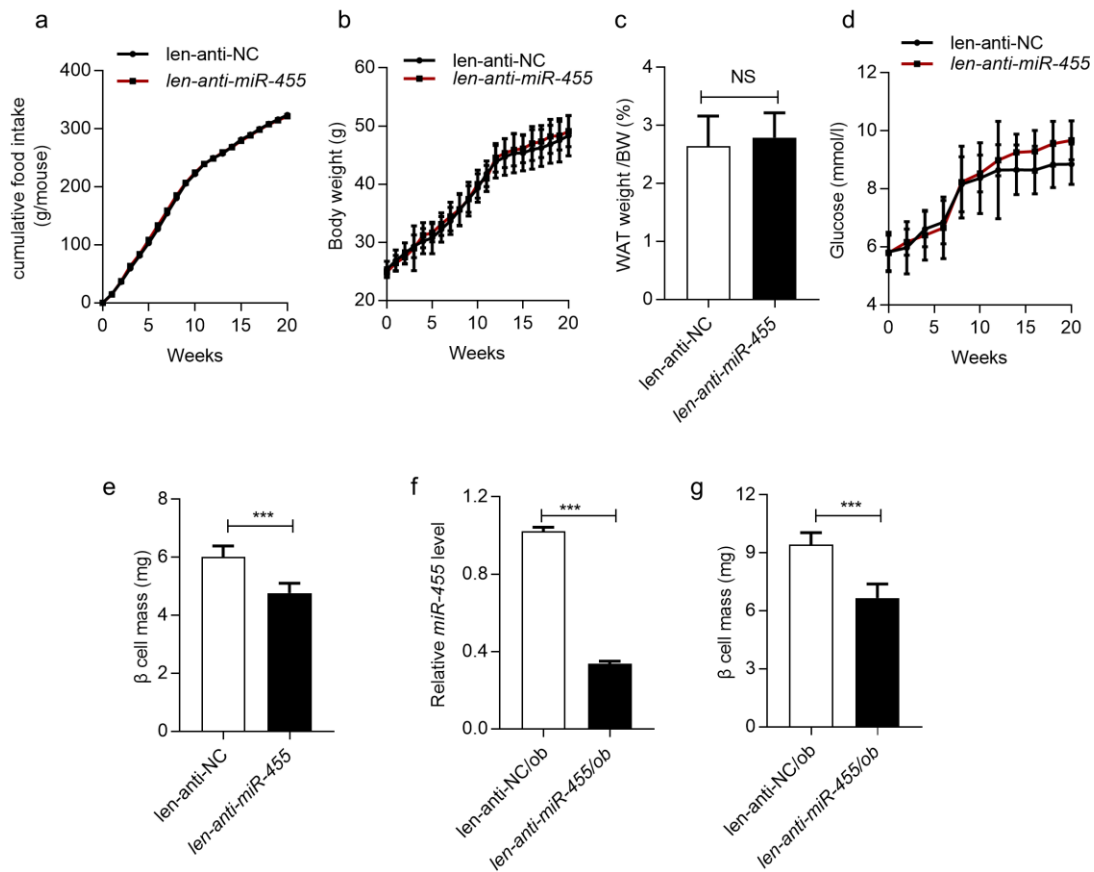

**Supplementary Figure 4** Eight-week-old male *len-anti-miR-455* mice and control mice (lentivirus-MIP (mouse insulin2 promoter)-LV3/H1 vector) were exposed to an HFD for 20 weeks.

Then, cumulative energy intake (a,  $n = 9$  mice per group), changes in body weight (b,  $n = 9$  mice per group), the white adipose tissue weight per body weight ratio (c,  $n = 9$  mice per group) and fasting blood glucose level (FBG) (d,  $n = 9$  mice per group) were measured. (e) The  $\beta$  cell mass of *len-anti-miR-455* mice was measured ( $n = 3$ ). (f) *miR-455* expression levels in the islets of *len-anti-miR-455/ob* mice ( $n = 3$ ). (g) The  $\beta$  cell mass in *len-anti-miR-455/ob* mice was measured ( $n = 3$ ). The data are presented as the mean  $\pm$  SD. \*\*\*  $p < 0.001$ .

Supplementary Figure 5

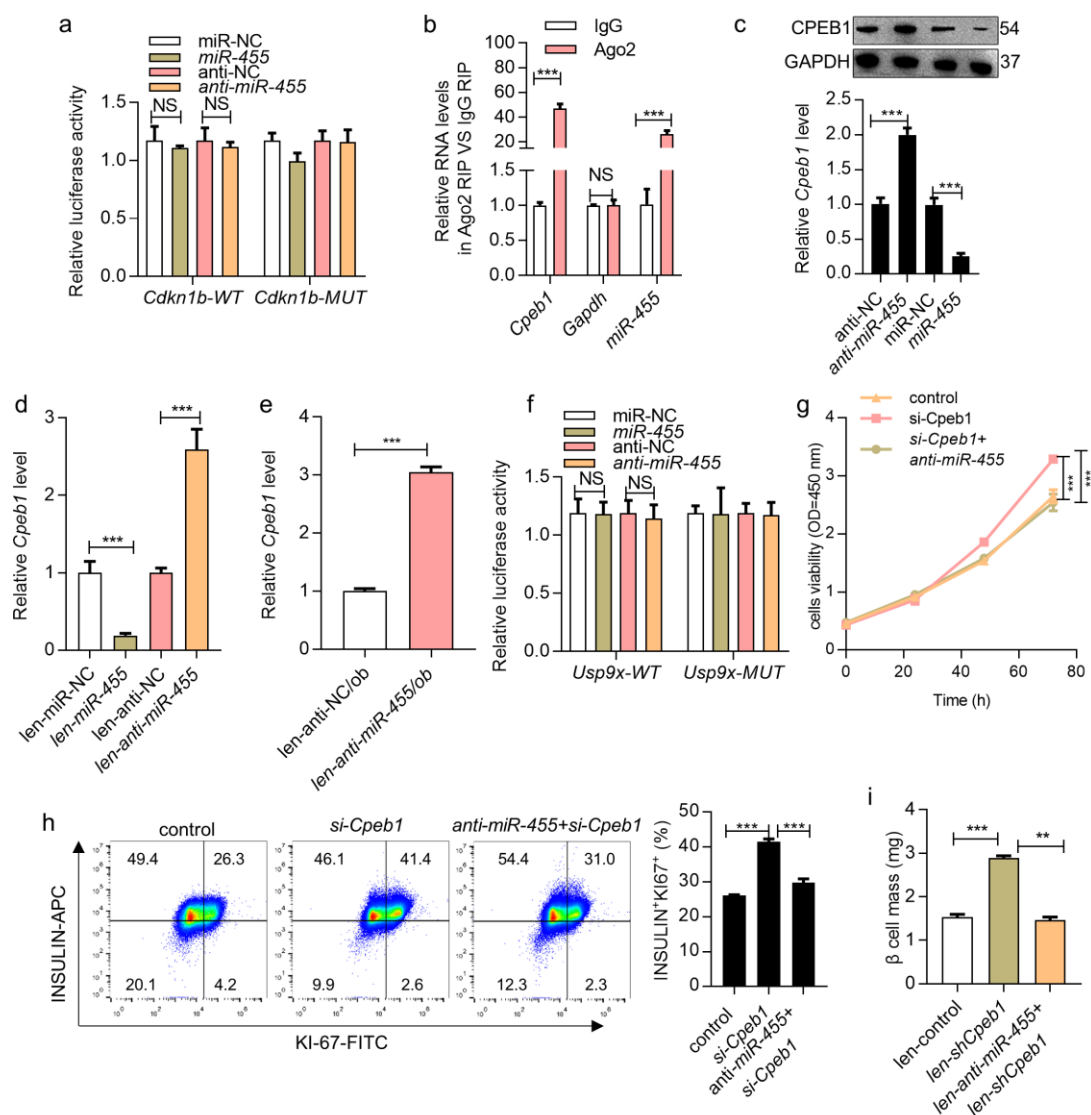

**Supplementary Figure 5** (a) Relative luciferase activity of MIN6 cells cotransfected with *miR-455* mimic and a luciferase reporter containing either *Cdkn1b-WT* or *Cdkn1b-MUT*. The data are presented as the relative ratio of Renilla luciferase activity to firefly luciferase activity. (b)

MIN6 cells were transfected with *Cpeb1* overexpression plasmid for 48 h. Then, MIN6 cell lysate was subjected to anti-Ago2 RNA immunoprecipitation (RIP), and the *miR-455* and *Cpeb1* expression levels were examined via qRT-PCR. *Gapdh* served as a control (nonspecific IgG served as a negative control). (c) CPEB1 mRNA and protein levels in MIN6 cells transfected with *miR-455* or *anti-miR-455*. (d-e) The *Cpeb1* mRNA level in islets from *len-miR-455* mice and *len-anti-miR-455/ob* mice ( $n = 3$ ). (f) Relative luciferase activity of MIN6 cells cotransfected with *miR-455* mimic and a luciferase reporter containing either *Usp9x-WT* or *Usp9x-MUT*. The data are presented as the relative ratio of Renilla luciferase activity to firefly luciferase activity. (g) CCK-8 assays were carried out at 24, 48, and 72 h after transfection with *si-Cpeb1* or *si-Cpeb1* and *anti-miR-455*. (h) The INSULIN<sup>+</sup>/KI-67<sup>+</sup> cells were counted via flow cytometry. (i) The  $\beta$  cell mass in *len-shCpeb1* mice was measured ( $n = 3$ ). The data are presented as the mean  $\pm$  SD. \*\*  $p < 0.01$ , \*\*\*  $p < 0.001$ .



Supplementary Figure 6

a

| Gene name        | ctaRAPID | RBPmap | Score |
|------------------|----------|--------|-------|
| <i>Rb1cc1</i>    | +        | -      | 6.23  |
| <i>Cdkn1b</i>    | +        | +      | 5.93  |
| <i>Rhoc</i>      | +        | -      | 5.86  |
| <i>Dvl2</i>      | +        | +      | 5.7   |
| <i>Igfbp6</i>    | +        | -      | 5.59  |
| <i>Gmn</i>       | +        | -      | 5.33  |
| <i>Tmem160</i>   | +        | -      | 5.05  |
| <i>Tnfrsf12a</i> | +        | +      | 4.94  |
| <i>Vangl2</i>    | +        | -      | 5.04  |
| <i>Emc10</i>     | +        | -      | 4.89  |
| <i>Ccni</i>      | +        | +      | 4.77  |
| <i>Cas1</i>      | +        | -      | 4.66  |
| <i>Cux1</i>      | +        | -      | 4.64  |
| <i>GLUT8</i>     | +        | -      | 4.57  |

c

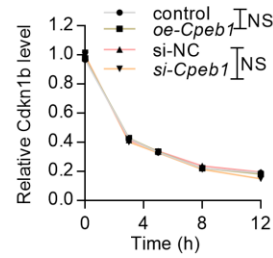

b

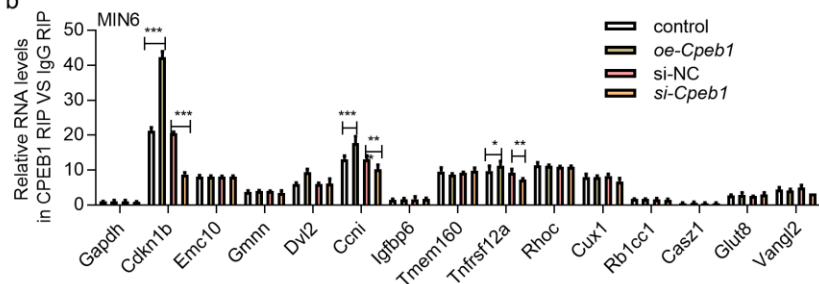

**Supplementary Figure 6** (a) ctaRAPID and RBPmap were used to predict mRNAs that can bind to CPEB1. (b) MIN6 cells were transfected with *oe-Cpeb1* and *si-Cpeb1* for 48 h. Then, MIN6 cell lysate was subjected to anti-CPEB1 RNA immunoprecipitation (RIP), and the precipitated RNAs were examined via qRT-PCR. *Gapdh* served as a control (nonspecific IgG served as a negative control). (c) MIN6 cells transfected with *oe-Cpeb1* or *si-Cpeb1* were treated with actinomycin D (10  $\mu$ g/ml). RNA was isolated at various time points after the treatment and analyzed via RT-qPCR. The data are presented as the mean  $\pm$  SD. \*  $p < 0.05$ , \*\*  $p < 0.01$ , \*\*\*  $p < 0.001$ .

Supplementary Figure 7

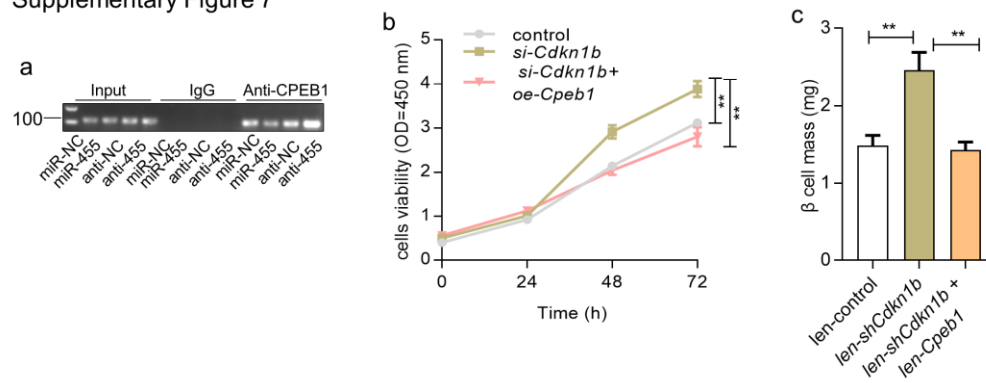

**Supplementary Figure 7** (a) RT-PCR-RIP was performed to verify the CPEB1–*Cdkn1b* interaction. (b) CCK-8 assays were carried out at 24, 48, and 72 h after transfection with *si-Cdkn1b* or *si-Cdkn1b* and *oe-Cpeb1*. (c) The  $\beta$  cell mass in *len-shCpeb1* mice was measured ( $n = 3$ ). The data are presented as the mean  $\pm$  SD. \*\*  $p < 0.01$ .

# Supplementary Spreadsheets:

**Table S1 RNA isolated from islets of control mice and *ob/ob* mice, this table shows significantly changed miRNA (Log2 fold change  $\geq 2$ ). The mean expression of each group was presented in a log2 scale.**

| miR_name        | control-read | <i>ob/ob</i> -read | log2(fold change) | p-value  | FDR      |
|-----------------|--------------|--------------------|-------------------|----------|----------|
| mmu-miR-6932-3p | 0.00         | 5.20               | 12.34             | 0.000899 | 0.018575 |
| mmu-miR-455-5p  | 1075.12      | 15104.93           | 3.84              | 3.60E-08 | 2.13E-06 |
| mmu-miR-677-3p  | 1.25         | 13.57              | 3.44              | 6.30E-05 | 0.002277 |
| mmu-miR-6546-5p | 1.29         | 12.19              | 3.25              | 0.000176 | 0.005328 |
| mmu-miR-212-3p  | 815.84       | 7001.88            | 3.10              | 9.37E-20 | 2.44E-17 |
| mmu-miR-132-3p  | 5648.74      | 41049.84           | 2.86              | 2.43E-21 | 7.91E-19 |
| mmu-miR-132-5p  | 589.23       | 4146.32            | 2.81              | 3.84E-16 | 5.55E-14 |
| mmu-miR-501-5p  | 91.11        | 636.67             | 2.80              | 2.31E-13 | 2.31E-11 |
| mmu-miR-212-5p  | 516.13       | 3417.69            | 2.73              | 4.47E-15 | 5.81E-13 |
| mmu-miR-1945    | 2.42         | 14.32              | 2.56              | 0.000368 | 0.008713 |
| mmu-miR-6546-3p | 2.31         | 11.77              | 2.35              | 0.002614 | 0.038215 |
| mmu-miR-1983    | 38.48        | 185.64             | 2.27              | 2.38E-08 | 1.55E-06 |
| mmu-miR-665-5p  | 5.71         | 25.86              | 2.18              | 9.37E-05 | 0.003047 |
| mmu-miR-7093-3p | 8.78         | 36.52              | 2.06              | 7.71E-05 | 0.002638 |
| mmu-miR-690     | 62.28        | 256.98             | 2.04              | 1.63E-07 | 9.23E-06 |
| mmu-miR-712-5p  | 3.44         | 14.07              | 2.03              | 0.002991 | 0.042759 |
| mmu-miR-150-5p  | 3591.51      | 867.79             | -2.05             | 1.25E-09 | 9.00E-08 |
| mmu-miR-142a-3p | 6707.08      | 1492.88            | -2.17             | 4.24E-11 | 3.67E-09 |
| mmu-miR-669o-5p | 18.09        | 3.74               | -2.28             | 0.000317 | 0.00792  |
| mmu-miR-592-5p  | 101.53       | 18.73              | -2.44             | 3.20E-08 | 1.98E-06 |
| mmu-miR-216b-5p | 5763.70      | 974.22             | -2.56             | 2.46E-14 | 2.91E-12 |
| mmu-miR-216a-5p | 13489.70     | 2161.92            | -2.64             | 2.81E-16 | 4.58E-14 |
| mmu-miR-217-5p  | 6074.72      | 865.87             | -2.81             | 1.54E-16 | 2.86E-14 |
| mmu-miR-216b-3p | 741.02       | 102.69             | -2.85             | 5.42E-14 | 5.88E-12 |
| mmu-miR-216a-3p | 99.84        | 13.45              | -2.89             | 4.48E-10 | 3.65E-08 |
| mmu-miR-6969-5p | 30.21        | 4.05               | -2.90             | 1.22E-06 | 6.10E-05 |
| mmu-miR-142a-5p | 12379.31     | 1612.28            | -2.94             | 3.99E-19 | 8.66E-17 |
| mmu-miR-217-3p  | 297.30       | 38.14              | -2.96             | 3.63E-13 | 3.37E-11 |
| mmu-miR-150-3p  | 10.44        | 1.27               | -3.03             | 0.000203 | 0.005812 |
| mmu-miR-6969-3p | 69.65        | 8.49               | -3.04             | 2.76E-09 | 1.89E-07 |
| mmu-miR-196b-5p | 13.90        | 1.26               | -3.46             | 1.28E-05 | 0.000522 |
| mmu-miR-184-3p  | 4929.72      | 257.98             | -4.26             | 1.16E-30 | 7.54E-28 |
| mmu-miR-122-3p  | 191.54       | 3.09               | -5.95             | 8.33E-28 | 3.61E-25 |
| mmu-miR-122-5p  | 5805.91      | 84.06              | -6.11             | 4.47E-52 | 5.81E-49 |

**Table S2 The primers used in PCR (5'-3').**

| Gene name                        | Forward Primer                                                      | Reverse Primer                                                  |
|----------------------------------|---------------------------------------------------------------------|-----------------------------------------------------------------|
| <i>oe-Cpeb1</i>                  | ctatagggagaccaagctgATGGCTTTCTCT<br>CTGGAAGAAGC                      | gctgatcagcgggtttaaacTCAGTTCTTCTG<br>GTTCTTCATTAGG               |
| <i>oe-Egr2</i>                   | ctatagggagaccaagctgATGATGACCGCC<br>AAGGCC                           | gctgatcagcgggtttaaacTCACGGTGTCCCT<br>GGTTTCGAG                  |
| <i>Has-EGR2</i>                  | ctatagggagaccaagctgtATGATGACCGC<br>CAAGGCC                          | gctgatcagcgggtttaaacTCAAGGTGTCC<br>GGGTCCG                      |
| <i>oe-Cdkn1b</i>                 | ctatagggagaccaagctgATGTCAAACGTG<br>AGAGTGTCTAACG                    | gctgatcagcgggtttaaacTTACGTCTGGCG<br>TCGAAGGC                    |
| promoter- <i>miR-4</i><br>55     | gagctcttacgcgtgctagcATTGGCAGAGGA<br>CAAGAACAGG                      | cagtaccggaatgccaagctGGCAGGCCCT<br>ACTTCATG                      |
| promoter- <i>miR-4</i><br>55-MUT | gatctttatgtgtgtgtTGTGGTATGAATCGCC<br>TTGTAGA                        | acacacacataaagaTCCCGCAGGCACAC<br>TCCA                           |
| <i>Has-miR-455</i><br>promoter   | agaacatttctctatcgataGCTCGACTTGCCT<br>GCCAGG                         | agcttacttagatcgcagatGATGACATAGGC<br>CTTGAGGCA                   |
| MUS-EMSA-W<br>T                  | CGGGAGTGTGTGTGCGGGAGTGTG                                            | CACACTCCCGCACACACACTCCCG                                        |
| MUS-EMSA-M<br>UT                 | CGGGATGTGTGTGTATTCTTGTG                                             | CACAAGAAATACACACACACCCCG                                        |
| HAS-EMSA-W<br>T                  | CTGTCCAGTGTGGGTGGTGACAATC                                           | GATTGTCACCACCCACACTGGACA<br>G                                   |
| HAS-EMSA-M<br>UT                 | CTGTCACTGTGTTTGTGTCCAATC                                            | GATTGGACAACAAACACAGTGAC<br>AG                                   |
| <i>Cpeb1-WT</i>                  | TCGAGtgacatgtct gccaatTTg ttctgggtgg<br>gcacattTgg taatcctgtc tGT   | CTAGAcagacaggattaccaaatgtcccaccag<br>aacaaaattggcagacatgtcaC    |
| <i>Cpeb1-MUT</i>                 | TCGAGtgacatgtct<br>gccaatTTCACtCgggtgTTACACCtttgg<br>taatcctgtc tGT | CTAGAcagacaggattacaaaaGGTGTAaCa<br>cccGgaGTGaaattggcagacatgtcaC |
| Cdkn1b-WT                        | TCGAGTgttactacctgtgtatatagttttatcttttactct<br>gtagcacataaT          | CTAGAttatgtgctacagagtaaaagataaaaactat<br>atacacaggtagtacaaC     |
| Cdkn1b-MUT                       | TCGAG<br>TgttactacctgtgtatatagtGGCCGCcttttactctgt<br>agcacataa T    | CTAGAttatgtgctacagagtaaaagGCGGCC<br>actatatacacaggtagtacaaC     |

**Table S3 The sequence of siRNA or sgRNA.**

| SiRNA/sgRNA name               | Forward promoter              |                               |
|--------------------------------|-------------------------------|-------------------------------|
| <i>si-Cpeb1</i>                | GCAGCACACAGUCAGUAUUTT         | AAUACUGACUGUGUGCUGCTT         |
| <i>si-Cdkn1b</i>               | CCCGGUCAAUCAUGAAGAATT         | UUCUUCAUGAUUGACCGGGTT         |
| <i>si-Egr2</i>                 | AAGGTATCATCAATATTGTGAGT       | ACTCACAATATTGATGATACCTT       |
| <i>miR-455-sgRNA-1</i>         | CACCGGTGGCTCACTTCCCAAGC<br>AG | AAACCTGCTTGGGAAGTGAGCC<br>ACC |
| <i>miR-455-sgRNA-2</i>         | CACCGGGTCGCCCGCGCCAGGC<br>CCA | AAACTGGGCCTGGCGCGGGCGA<br>CCC |
| <i>miR-455-sgRNA-3</i>         | CACCGGCTGCATCCCTTGCTGCG<br>TC | AAACGACGCAGCAAGGGATGCA<br>GCC |
| <i>Has-si-EGR2</i>             | AGCUGUCUGACAACAUCUACC         | UAGAUGUUGUCAGACAGCUGG         |
| <i>Has-miR-455<br/>sgRNA-1</i> | CACCGACTAACAGCGGCTGCGA<br>ACC | AAACGGTTCGCAGCCGCTGTTAG<br>TC |
| <i>Has-miR-455<br/>sgRNA-1</i> | CACCGAAGGGCAGTAACCTCGC<br>CCG | AAACCGGGCGAGGTTACTGCCCT<br>C  |
| <i>Has-miR-455<br/>sgRNA-1</i> | CACCGGCAGAAGGAAGCTCGCG<br>GCT | AAACAGCCGCGAGCTTCCTTCTG<br>CC |

**Table S4 The primers used in Real-time PCR (5'-3').**

| Gene               | Forward Primer            | Reverse Primer             |
|--------------------|---------------------------|----------------------------|
| <i>Mus-miR-455</i> | TAATCTGACTATGTGCCTTTGGACT | TATGGTTTTGACGACTGTGTGAT    |
| <i>Has-miR-455</i> | TAATCTGACTATGTGCCTTTGGACT | TATGGTTTTGACGACTGTGTGAT    |
| <i>Cpeb1</i>       | AAGGATTGCTGGGACAACCAA     | GGCCACGGGGAGATTCTTG        |
| <i>Gapdh</i>       | AGGTCGGTGTGAACGGATTTG     | TGTAGACCATGTAGTTGAGGTCA    |
| <i>Cdkn1b</i>      | TCAAACGTGAGAGTGTCTAACG    | CCGGGCCGAAGAGATTTCTG       |
| <i>ChIP-R1</i>     | AGTACAGTGCCTGGCTGTGTCTGCG | AACTCACGAGCACGGCTCAGCCCTG  |
| <i>ChIP-R2</i>     | GCTCCTCCCGGCGCCGTCG       | TGGGTCCCCAAGTGTGACGCTG     |
| <i>HAS-ChIP</i>    | GGCCCTGGGTGACCCCTGAAGTATG | GCTGCGAACCCTGGAGTGCCAACATT |
| <i>Ins1</i>        | CACTTCCTACCCCTGCTGG       | ACCACAAAGATGCTGTTTGACA     |
| <i>Ins2</i>        | GCTTCTTCTACACACCCATGTC    | AGCACTGATCTACAATGCCAC      |
| <i>Zfp281</i>      | CCTTCCCCCAGAGTATGGTTA     | TCCTTCTTGAAAGTCATGTCCG     |
| <i>Foxl1</i>       | GAGCAGAGGGGTCACACTGAAC    | CTTCCTGCGCCGATAAATTGC      |
| <i>Tcf3</i>        | CGCACCAGCAGTACAGATGAG     | CAGCTTGGTCTGCGCCTTA        |
| <i>Meis1</i>       | GCAAAGTATGCCAGGGGAGTA     | TCCTGTGTTAAGAACCGAGGG      |
| <i>Spi1</i>        | ATGTTACAGGCGTGCAAAATGG    | TGATCGCTATGGCTTTCTCCA      |
| <i>Rhox11</i>      | TGAGCTTCTGTGAGGAAGAAATC   | CCTCTTTCGGGATGCCTGTTA      |
| <i>Foxj3</i>       | AGCCTAACATCTATGGACTGGT    | GGTCAAGGAGTGCATTCTTCTTA    |
| <i>Gfi1b</i>       | ATGCCACGGTCCCTTCTAGTG     | GGAAGGCTCTGGTTCAGCAA       |
| <i>Wt1</i>         | GAGAGCCAGCCTACCATCC       | GGGTCCCTCGTGTTTGAAGGAA     |
| <i>Ecm10</i>       | TCAATGGCCTCTACAGGGTCC     | AGCTTCTGAACCATCAAGTGTC     |
| <i>Igfbp6</i>      | GCTGCTAATGCTGTTGTTTCGC    | GCACTTAGGGCTGTAGACCC       |
| <i>Tmem160</i>     | CTCCGCAAGGCACATGAGA       | AGACCCACCGCATAGGAGG        |
| <i>Cas21</i>       | CCTCGCCTTTCTTGGGCAA       | CACTGGGCATCACAGAAGTCC      |
| <i>Gmnn</i>        | GGGAGCCCAAGAGAATGTGAA     | CAAGCCTTTTGGCAACTCATTT     |
| <i>Vangl2</i>      | ACTCGGGCTATTCTTACAAGT     | TGATTTATCTCCACGACTCCCAT    |
| <i>Cux1</i>        | GGGGGAACAGGTTTCCAATAC     | AAGGACTGCATTAGCTGTTCGC     |
| <i>Dvl2</i>        | GGTGTAGGCGAGACGAAGG       | GCTGCAAAACGCTCTTGAAATC     |
| <i>GLUT8</i>       | CCCTTCGTGACTGGCTTTG       | TGGGTAGGCGATTTCCGAGAT      |
| <i>Ccni</i>        | CAGGACCTTTGGAAAACCAGAG    | TTGGATGGGCTTTTACTGTAGC     |
| <i>Rb1cc1</i>      | GACACTGAGCTAACTGTGCAA     | GCGCTGTAAGTACACACTCTTC     |
| <i>Tnfrsf12a</i>   | GTGTTGGGATTTCGGCTTGGT     | GTCCATGCACTTGTCGAGGTC      |
| <i>Rhoc</i>        | ATGGCTGCGATCCGAAAGAAG     | GCACGTAGACCTCTGGAAACT      |
| <i>Cdkn1a</i>      | CCTGGTGATGTCCGACCTG       | CCATGAGCGCATCGCAATC        |
| <i>Cdkn1c</i>      | CGAGGAGCAGGACGAGAATC      | GAAGAAGTCGTTTCGCATTGGC     |
| <i>Cdkn2a</i>      | CGCAGGTTCTTGGTCACTGT      | TGTTACGAAAGCCAGAGCG        |
| <i>Cdkn2b</i>      | CCCTGCCACCCTTACCAGA       | CAGATACCTCGCAATGTCACG      |
| <i>Cdkn2c</i>      | CCTTGGGGGAACGAGTTGG       | AAATTGGGATTAGCACCTCTGAG    |
| <i>Cdkn2d</i>      | CTGAACCGCTTTGGCAAGAC      | GCCCTCTCTTATCGCCAGAT       |
| <i>Has-CPEB1</i>   | GATGCAAATGACTTGTGCCTTG    | GGCTGAGGAATCTGAGTCCTG      |

|                                 |                         |                        |
|---------------------------------|-------------------------|------------------------|
| <i>Has-EGR2</i>                 | TCAACATTGACATGACTGGAGAG | AGTGAAGGTCTGGTTTCTAGGT |
| <i>Has-Cdkn1b</i>               | AACGTGCGAGTGTCTAACGG    | CCCTCTAGGGGTTTGTGATTCT |
| <i><math>\beta</math>-Actin</i> | GGCTGTATTCCCCTCCATCG    | CCAGTTGGTAACAATGCCATGT |

**Table S5 The antibodies used in Western blot, IHC and IF.**

| Protein     | Catalog                | Dilution for<br>WB | Dilution for<br>IHC and IF | FACS |
|-------------|------------------------|--------------------|----------------------------|------|
| INSULIN-647 | Cell Signaling (c27c9) |                    |                            | 1:50 |
| KI-67 FITC  | Biologend (652409)     |                    |                            | 1:50 |
| EGR2        | Abcam (ab108399)       | 1:1000             |                            |      |
| CPEB1       | Abcam (ab73287)        | 1:1000             |                            |      |
| CDKN1B      | Abcam (193379)         | 1:1000             |                            |      |
| INSULIN     | Servicebio (GB13121)   |                    | 1:500                      |      |
| GLUCAGON    | CST (2760)             |                    | 1:500                      |      |
| Argonaute 2 | CST (2897s)            | 1:1000             |                            |      |
| KI-67       | Abcam (ab1667)         |                    | 1:500                      |      |
| GAPDH       | Abcam (ab181602)       | 1:1000             |                            |      |
